# Supplementary material for: Structure, photoluminescence and abnormal thermal quenching behavior of Eu2+-doped Na3Sc2(PO4)3: a novel blue-emitting phosphor for n-UV LEDs
Source: Royal Society of Chemistry journal article supplement (doi:10.1039/c6tc01049k), 2016-01-01
Supplement: c6tc01049k1.pdf [file c6tc01049k1.pdf]

# Structure, Photoluminescence and Abnormal Thermal Quenching Behavior of $\text{Eu}^{2+}$ -doped $\text{Na}_3\text{Sc}_2(\text{PO}_4)_3$ : a Novel Blue-emitting Phosphor for n-UV LEDs

Xicheng Wang,<sup>ab</sup> Zhengyan Zhao,<sup>ab</sup> Quansheng Wu,<sup>ab</sup> Chuang Wang,<sup>ab</sup>  
Qian Wang,<sup>ab</sup> Li Yanyan,<sup>ab</sup> and Yuhua Wang,<sup>ab,\*</sup>

<sup>a</sup>Key Laboratory for Special Function Materials and Structural Design of the Ministry of the Education,

<sup>b</sup>Department of Material Science, School of Physical Science and Technology, Lanzhou University, Lanzhou, 730000, China

## Corresponding Author

\*E-mail: wyh@lzu.edu.cn

Tel.: +86-931-8912772 (office); Fax: +86-931-8913554 (office);

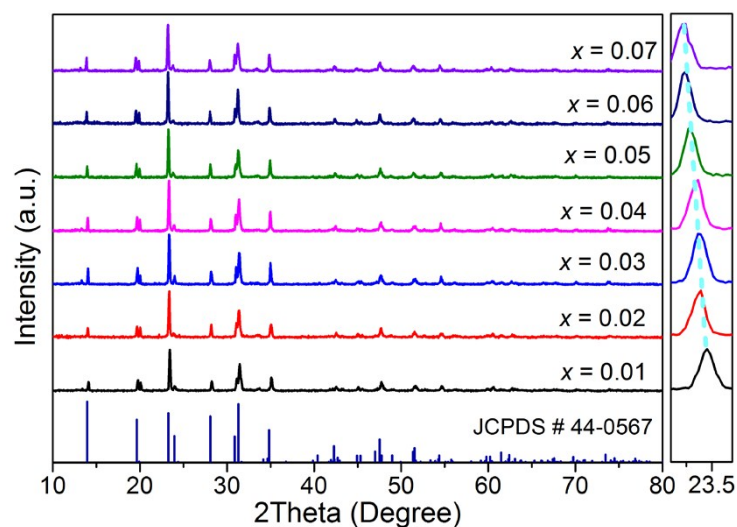

**Figure S1.** The XRD patterns of NSP: $x\text{Eu}^{2+}$  samples ( $0.01 \leq x \leq 0.07$ ).

**Table S1.** Atomic coordinates and isotropic displacement parameters for NSP

| Atom | Wyckoff | S.O.F  | x          | y          | z         | Uiso     |
|------|---------|--------|------------|------------|-----------|----------|
| Na   | 18e     | 0.6667 | 0.6092(26) | 0          | 1/4       | 0.11(1)  |
| Sc   | 12c     | 0.3333 | 0          | 0          | 0.3455(3) | 0.021(5) |
| P    | 18e     | 1      | 0          | 0.3123(4)  | 1/4       | 0.025(7) |
| O1   | 36f     | 1      | 0.1824(13) | 0.2014(12) | 0.4087(5) | 0.056(4) |
| O2   | 36f     | 1      | 0.0372(14) | 0.2543(13) | 0.1934(7) | 0.008(8) |

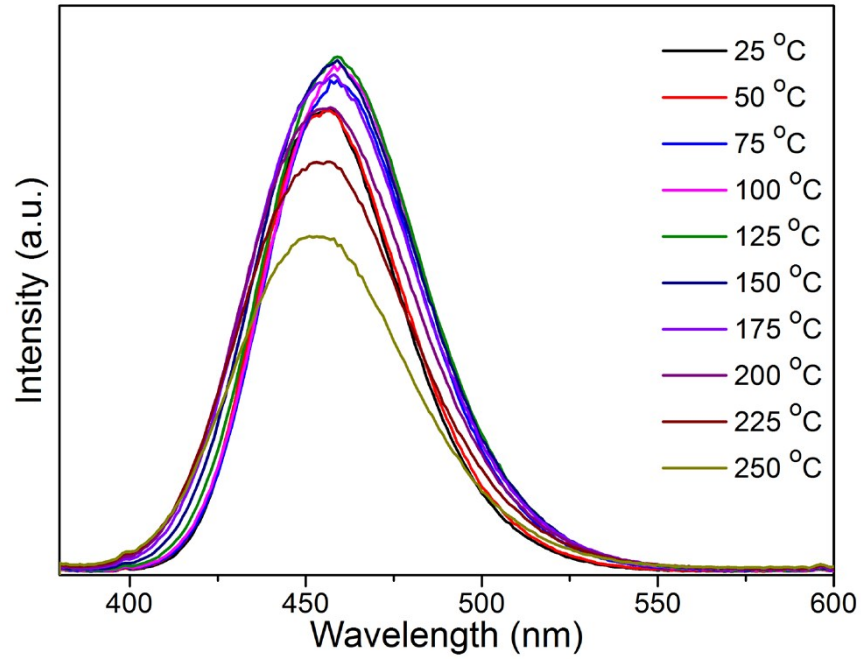

**Figure S2.** The temperature dependence of PL spectra of NSP:0.03Eu<sup>2+</sup> phosphor.

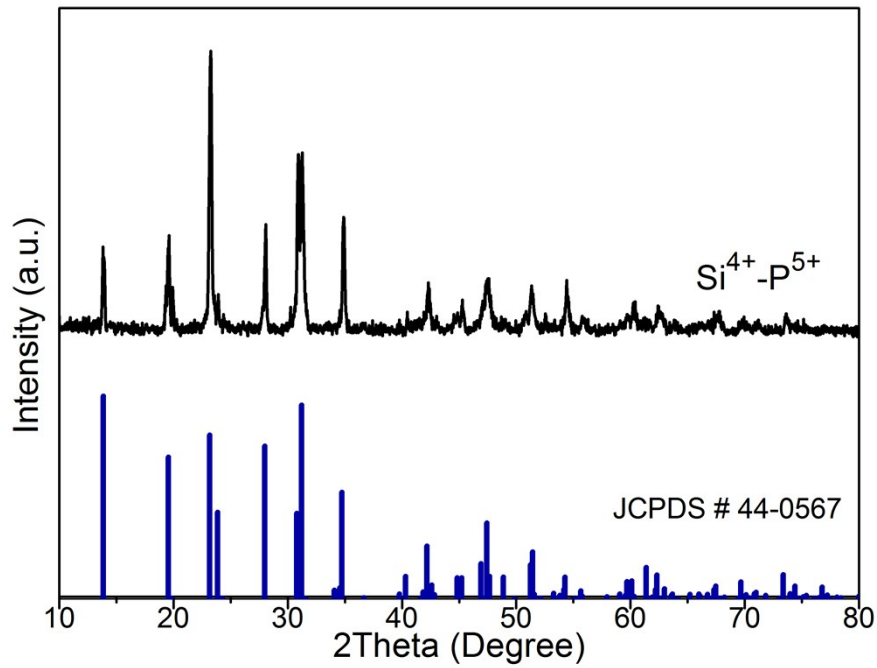

**Figure S3.** The XRD patterns of Si<sup>4+</sup>-P<sup>5+</sup> charge compensated NSP:Eu<sup>2+</sup>.

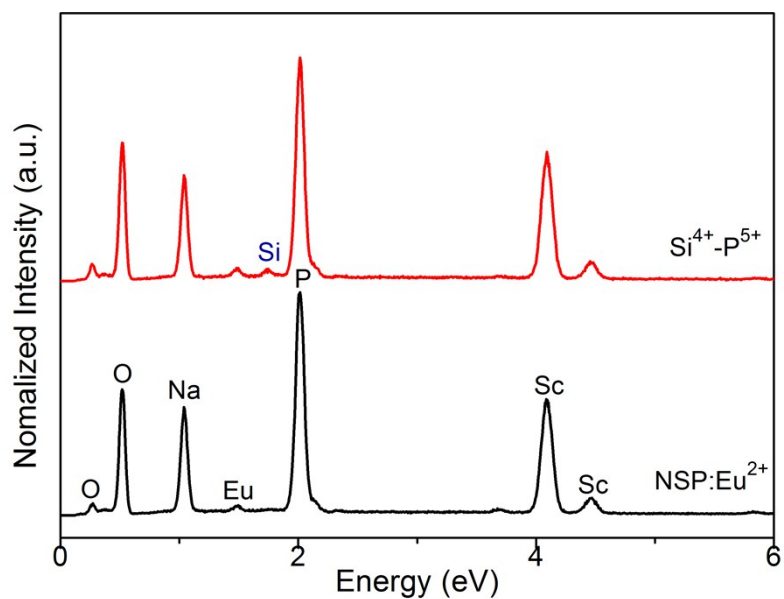

**Figure S4.** The EDS spectra of Si<sup>4+</sup>-P<sup>5+</sup> charge compensated NSP:Eu<sup>2+</sup> compared with the NSP:0.03Eu<sup>2+</sup>.

**Table S2.** The element compositions of Si<sup>4+</sup>-P<sup>5+</sup> charge compensated NSP:Eu<sup>2+</sup> compared with the NSP:0.03Eu<sup>2+</sup>.

| Atom%                             | Na    | Sc    | P     | Si   | O     | Eu   |
|-----------------------------------|-------|-------|-------|------|-------|------|
| NSP:Eu <sup>2+</sup>              | 15.07 | 10.86 | 12.78 | 0.01 | 61    | 0.18 |
| Si <sup>4+</sup> -P <sup>5+</sup> | 14.82 | 10.11 | 13.1  | 0.27 | 61.56 | 0.15 |
